# Supplementary material
Source: HighWire-hosted journal article supplement (https://bmjopen.bmj.com/content/10/9/e035674)
Supplement: inline-supplementary-material-1 [file inline-supplementary-material-1.pdf]

**Focus Group Discussion for clinicians at participating units:  
Topic guide**

|                                                                                                                                                                                                                                                                                                                                                                                                                                                                                                                                                                                                                                                                                                                         |
|-------------------------------------------------------------------------------------------------------------------------------------------------------------------------------------------------------------------------------------------------------------------------------------------------------------------------------------------------------------------------------------------------------------------------------------------------------------------------------------------------------------------------------------------------------------------------------------------------------------------------------------------------------------------------------------------------------------------------|
| <ul style="list-style-type: none"> <li>• What are your attitudes towards the OASI Care Bundle?</li> <li>• What drove the positive/negative reaction?</li> <li>• Do you know anyone who have suffered long-term effects of perineal trauma?</li> <li>• What training did you receive on the care bundle?</li> <li>• What were your thoughts on the awareness campaign / promotional materials / Launch</li> </ul>                                                                                                                                                                                                                                                                                                        |
| <ul style="list-style-type: none"> <li>• What are your thoughts on the 'train the trainer' model?</li> <li>• How did delivery suite support the training sessions?</li> <li>• Do you think your hospital was motivated to implement the care bundle?</li> <li>• What were the main issues around actually using the care bundle?</li> <li>• What do you think about having a sticker checklist as a reminder of important things one must not forget?</li> <li>• Do you think that women are happy with the OASI Care Bundle?</li> </ul>                                                                                                                                                                                |
| <ul style="list-style-type: none"> <li>• Do you know who your local champions are?</li> <li>• Have you been involved in any monitoring of the care bundle?</li> <li>• What proportion of the staff in the hospital do you think are using the care bundle?</li> </ul>                                                                                                                                                                                                                                                                                                                                                                                                                                                   |
| <ul style="list-style-type: none"> <li>• Has your knowledge of OASI improved since the care bundle was introduced?</li> <li>• Has the care bundle been integrated into routine practice?</li> <li>• Do you think the rates of OASI have changed?</li> <li>• Did you feel comfortable with using the care bundle? Has there been sufficient training? Will you continue to use it once the project is over?</li> <li>• What were the barriers to using the care bundle? What were the enablers?</li> <li>• Do you think the care bundle is sustainable?</li> <li>• Of all the things we've discussed today, what would you say are the most important issues you would like to express about the care bundle?</li> </ul> |
